# Supplementary material for: Widening the landscape of transcriptional regulation of green algal photoprotection
Source: PubMed Central journal article supplement (PMC10172295; doi:10.1038/s41467-023-38183-4), 2023-05-10
Supplement: 41467_2023_38183_MOESM1_ESM.pdf [file 41467_2023_38183_MOESM1_ESM.pdf]

29 **Supplementary Note 1**

30 In the course of independent projects aiming to identify novel regulators of *LHCSR3*, we have investigated the  
31 role of four transcriptional factors, designated as TF1-4, in regulating expression of *LHCSR3.1* (*TF1*: MYB-like  
32 DNA-binding protein, Cre01.g034350; *TF2*: RWP8, RWP-RK transcription factor, Cre04.g218050; *TF3*: RWP5,  
33 RWP-RK transcription factor, Cre06.g285600; *TF4*: bHLH domain-containing protein, Cre07.g349152).  
34 Mutants bearing mutations in TF1-4 genes were ordered from the CliP library <sup>1</sup>. After confirming  
35 (Supplementary Fig. 2a) that expression of the genes of interest was abolished (*tf1-3* mutants) or was  
36 significantly higher than in WT (for the case of *tf4-oe*), we applied the following experimental setup to probe  
37 for *LHCSR3.1* expression: WT and mutant cells were acclimated for 16h in LL (15  $\mu\text{mol photons m}^{-2} \text{s}^{-1}$ ). After  
38 sampling under the LL condition, light intensity was increased to 300  $\mu\text{mol photons m}^{-2} \text{s}^{-1}$  (HL); samples for  
39 RNA extraction were taken after 1 h of exposure to HL. Our data showed that WT and mutants had similar  
40 expression levels of *LHCSR3.1* (**Supplementary Fig. 2**), excluding a role of these TFs in regulating transcription  
41 of *LHCSR3.1*.

42 **Supplementary Note 2**

43 Simulation studies<sup>2</sup> indicated that the top 10% of the edges in the consensus network are enriched in positive  
44 interactions if the underlying approaches perform better than guessing. Thus, a higher overlap with the  
45 consensus networks is expected to result in improved predictions. We found that the interactions from the  
46 network deconvolution approach exhibited the largest overlap with the consensus network, while GGM  
47 assigns the highest rank to consensus interactions (**Supplementary Fig. 4a**). Repeating this analysis by  
48 including the two worse performing approaches (i.e. ARACNE and Silencing) resulted in no qualitative changes  
49 in the overlap (**Supplementary Fig. 4b**) and only 7.47% of difference in the included interactions compared to  
50 the original consensus network, demonstrating the robustness of the inferred interactions. Considering the  
51 10% network density threshold, we also inspected the proportion of TF-TF interactions in the different  
52 networks and their consensus; we found that it ranges from 2.55% in the GENIE3 network to 2.77% in the  
53 network deconvolution approach (**Supplementary Fig. 4c**). Since the fully connected network, containing all  
54 possible TF-TF and TF-target interactions, has a relative TF-TF interaction content of 2.52%, these findings  
55 suggest an enrichment of TF-TF interactions in GRNs inferred by all five approaches considered in the  
56 consensus.

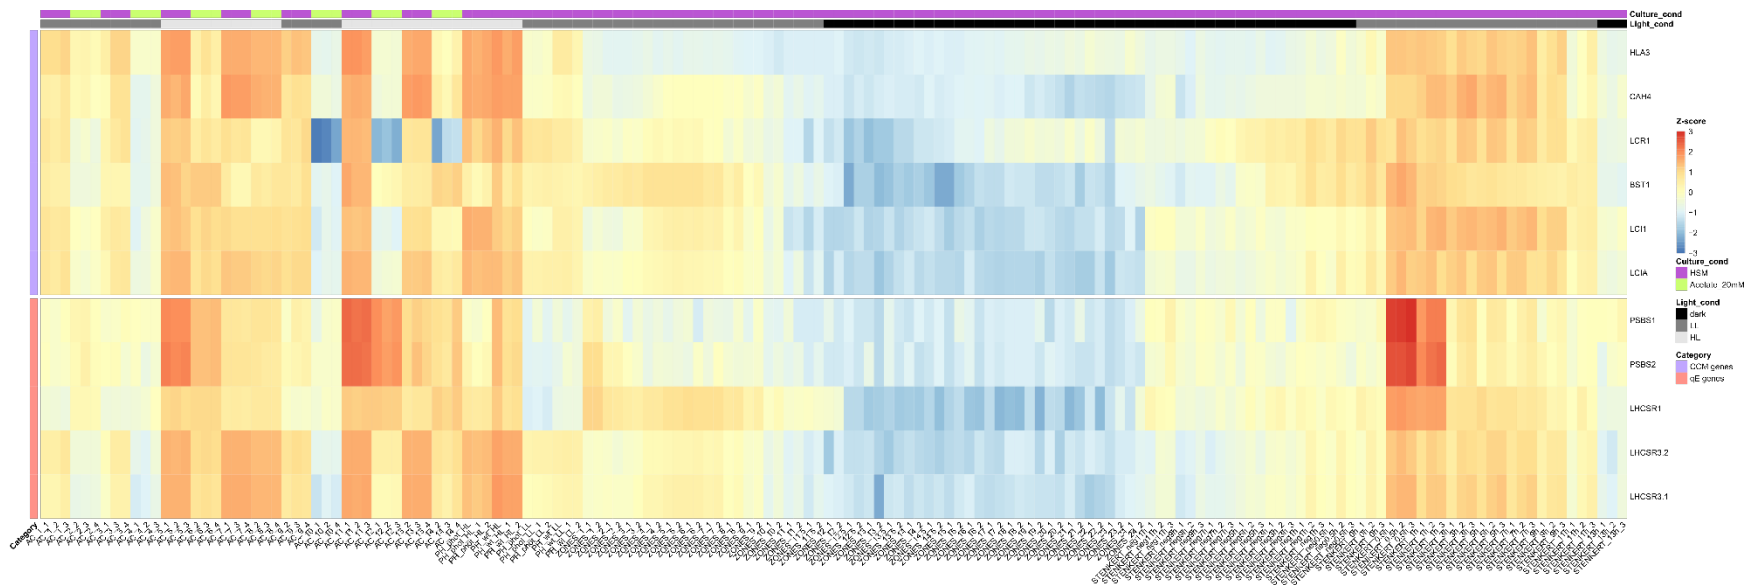

57  
58

59 **Supplementary Fig. 1: Z-score of log-transcript levels for representative CCM and qE genes in the used RNAseq data set.** Enlarged  
 60 representation of **Fig. 1a** with sample names included (see **Supplementary Table 1** for more details). Expression levels of representative carbon  
 61 concentrating mechanism (CCM) and qE genes are plotted over all samples used for network inference (z-scaled log values are depicted, high  
 62 values red, low values blue). The column annotation gives information on the culture conditions and data set (purple – Sueoka's high salt  
 63 medium (HSM), green – HSM + 20mM acetate, light grey – high light (HL), dark grey - low light (LL), black – no light) see also **Supplementary**  
 64 **Table 1**); no clustering was applied. The last digit of the column names indicates the replicate number.

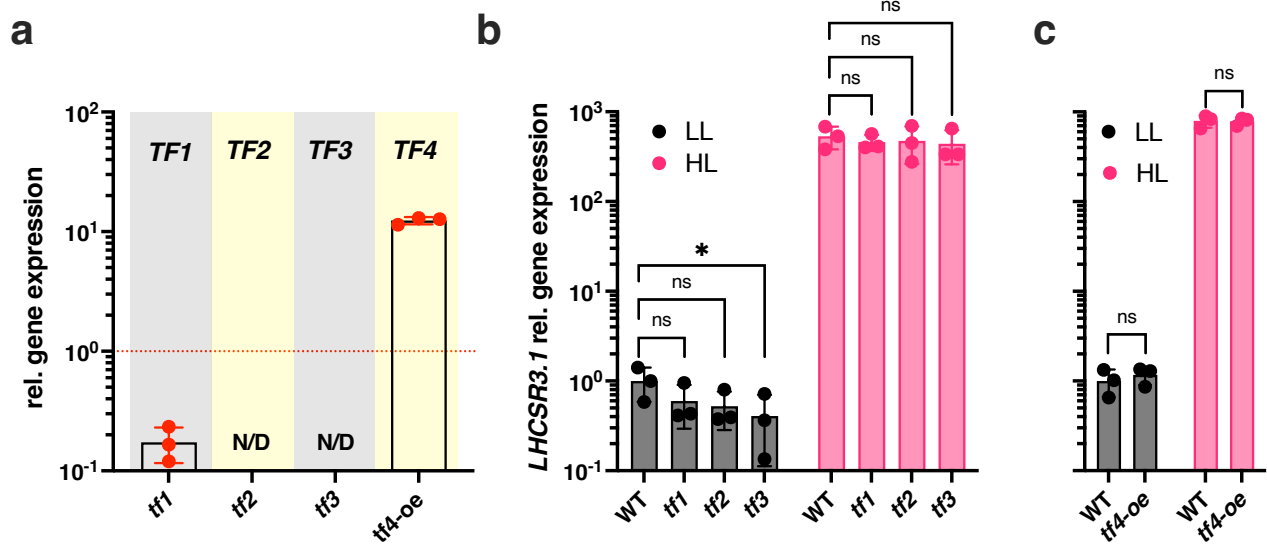

65

66 **Supplementary Fig. 2: LHCSR3.1 expression in mutants bearing mutations in transcription factors TF1-4.** **a**  
67 Relative expression levels of *TF1-4* in *tf1*, *tf2*, *tf3* and *tf4* mutant strains, grown under LL conditions in tris-  
68 acetate-phosphate (TAP) medium, normalized to WT (indicated as a red dashed line in the figure); N/D: non-  
69 detectable ( $n = 3$  biological samples, mean  $\pm$  sd). **b** and **c** WT, *tf1*, *tf2*, *tf3* and *tf4* cells were acclimated for 16h  
70 in LL ( $15 \mu\text{mol photons m}^{-2} \text{s}^{-1}$ ). After sampling under the LL conditions, light intensity was increased to  $300$   
71  $\mu\text{mol photons m}^{-2} \text{s}^{-1}$  (HL); samples were taken 1 h after exposure to HL. Shown are relative expression levels  
72 of *LHCSR3.1* at the indicated conditions normalized to WT LL ( $n = 3$  biological samples, mean  $\pm$  sd) for **b** WT  
73 (CC-4533) and *tf1-3* and **c** for WT (CC-125) and *tf4-oe*, a strain overexpressing *tf4* in the CC-125 background.  
74 The p-values for the comparisons between the mutants and the WT are based on ANOVA Dunnett's multiple  
75 comparisons test using log<sub>10</sub>-transformed values; the p-values are indicated in the graphs (\*,  $P < 0.005$ ; ns:  
76 non-significant). *TF1*: MYB-like DNA-binding protein, Cre01.g034350; *TF2*: RWP8, RWP-RK transcription factor,  
77 Cre04.g218050; *TF3*: RWP5, RWP-RK transcription factor, Cre06.g285600; *TF4*: bHLH domain-containing  
78 protein, Cre07.g349152).

79

80

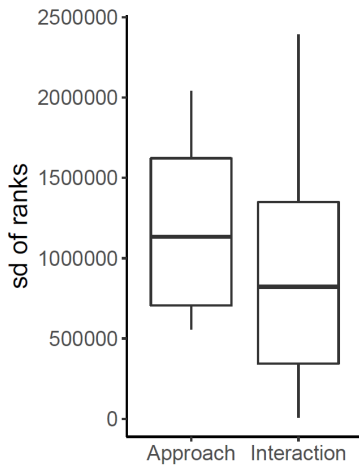

81

82

83 **Supplementary Fig. 3: Variation in ranks of known (positive) interactions across approaches and**  
84 **interactions from different inference approaches.** Boxplots of the standard deviation of ranks calculated for  
85 the curated interactions plotted in **Fig. 1b** over all ranks assigned by one approach (n=5 independent network  
86 inference approaches) or over all ranks assigned to one interaction (n=18 known interactions). The boxes  
87 mark the 2<sup>nd</sup> (25<sup>th</sup> percentile) and 3<sup>rd</sup> quartile (75<sup>th</sup> percentile), with the line in the middle marking the median  
88 (50<sup>th</sup> percentile). Whiskers extend to the most extreme measurement whose difference to the median is less  
89 than 1.5 interquartile ranges.

90

91

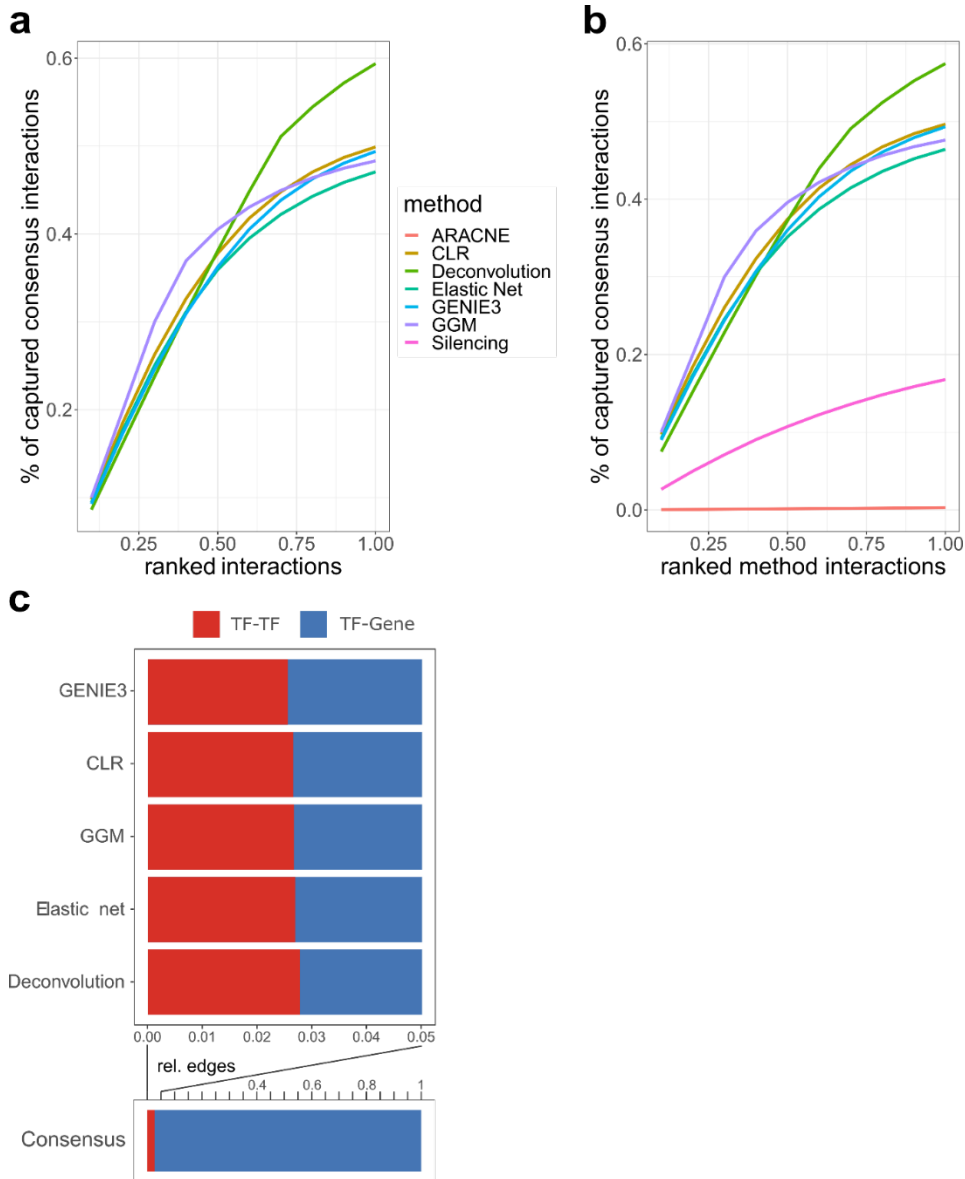

92

93 **Supplementary Fig. 4: Overlap of consensus network with individual inference methods and proportion of**  
 94 **TF-TF interactions in the obtained GRNs. a.** The graph shows the overlap between the edges of the consensus  
 95 network and the ranked interactions of the individual approaches normalized to the total number of edges in  
 96 the consensus network used for regulator prediction. **b.** Same as in a but plotting the overlap with a consensus  
 97 of all used approaches (including ARACNE and Silencing). **c.** Bar plots provide the proportion of TF-TF  
 98 interactions (red) in comparison to TF-target gene interactions (blue) contained in the GRNs inferred by the  
 99 different approaches and the consensus GRN resulting from their integration. All depicted analyses  
 100 considered only the interactions within in the 10% network density threshold (see **Methods**).

101

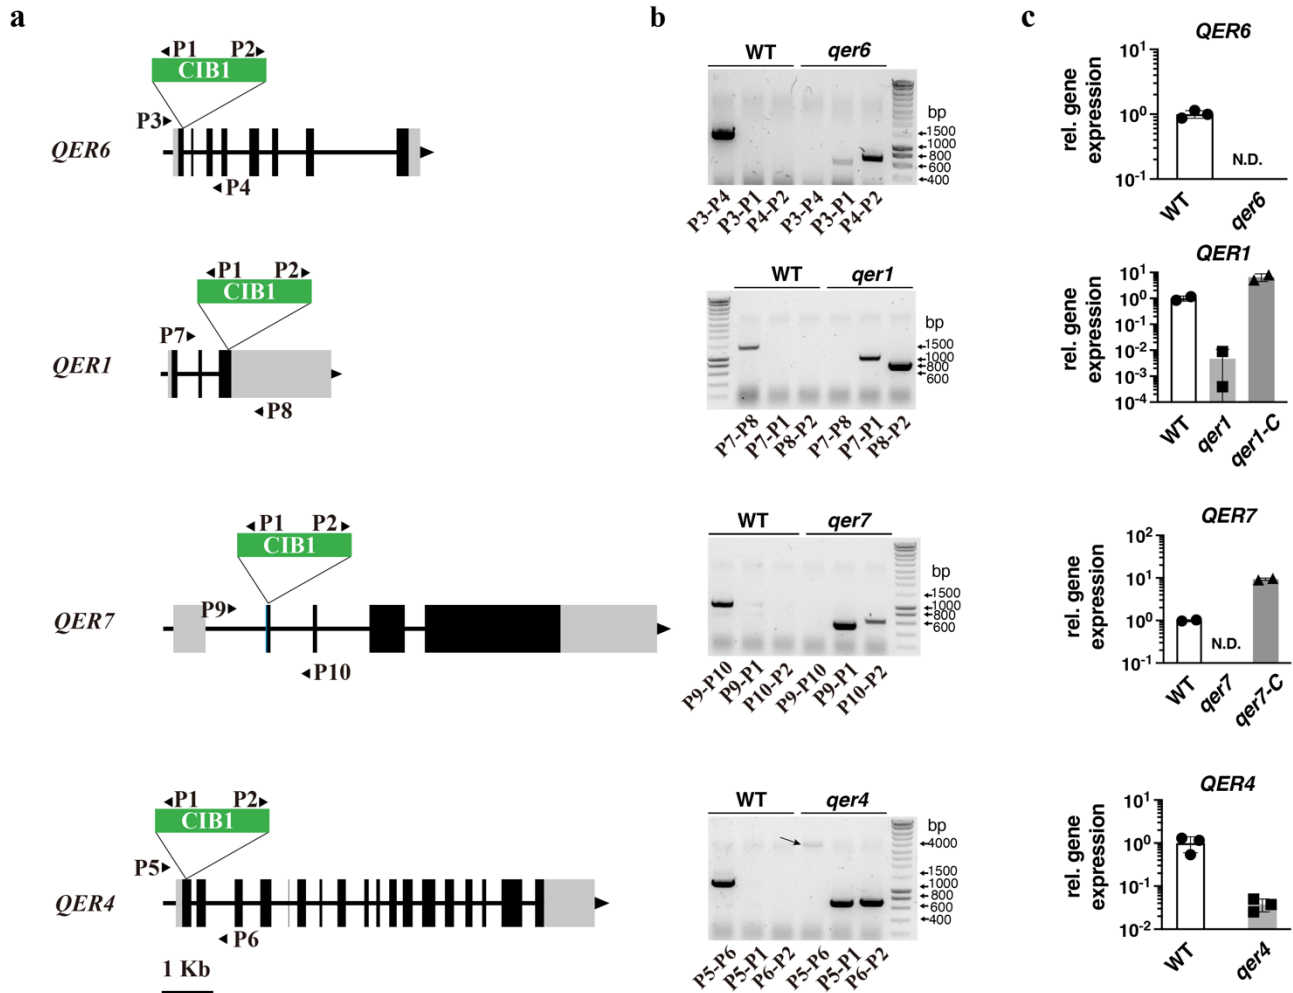

102  
103  
104  
105  
106  
107  
108  
109  
110  
111  
112  
113  
114  
115  
116  
117  
118

**Supplementary Fig. 5: Genotyping of CLiP mutants affected in the predicted regulators of qE-related genes.**  
**a.** Insertion map of the CIB1 cassette in the different genes. Exons are shown in black, introns as interconnecting lines, 5'UTR and 3'UTR in light gray, and primers in arrows. The insertion site of the CIB1 cassette is indicated by the triangle; **b.** PCR-validation of the insertion site in the different CLiP mutants using genomic DNA. To confirm the CIB1 insertion site, gene-specific primers were used that anneal upstream and downstream of the predicted insertion site of the cassette (primer pairs P3-P4, P7-P8, P9-P10 and P5-P6 for *qer6*, *qer1*, *qer7* and *qer4* respectively; **Supplementary Table 12**). Pairs of primers used are indicated at the bottom of the agarose gels used to separate the PCR products. Note that the PCR product of P5-P6 is indicated by an arrow. **c.** Relative expression levels of predicted qE regulator genes in the different CLiP mutants after exposure to HL ( $300 \mu\text{mol photons m}^{-2} \text{s}^{-1}$ ) for 1h. For QER6 and QER4:  $n = 3$  biological samples, mean  $\pm$  sd; for QER1 and QER7:  $n = 2$  biological samples.

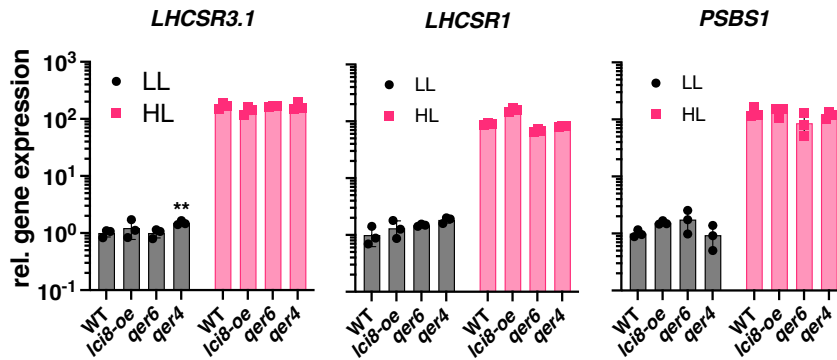

119

120

121

122

123

124

125

126

**Supplementary Fig. 6: qE gene and protein expression in mutants bearing mutations in predicted qE regulator genes.** WT, *lci8-oe*, *qer6* and *qer4* cells were acclimated for 16h in LL (15  $\mu\text{mol photons m}^{-2} \text{s}^{-1}$ ). After sampling for the LL conditions, light intensity was increased to 300  $\mu\text{mol photons m}^{-2} \text{s}^{-1}$  (HL); samples were taken 1 h after exposure to HL. Shown are relative expression levels of *LHCSR3.1*, *LHCSR1* and *PSBS1* at the indicated conditions normalized to WT LL ( $n = 3$  biological samples, mean  $\pm$  sd). The two-sided p-values for the comparisons between the mutants and the WT are based on ANOVA Dunnett's multiple comparisons test on log<sub>10</sub>-transformed values and are indicated in the graphs (\*\*,  $P = 0.0032$ ).



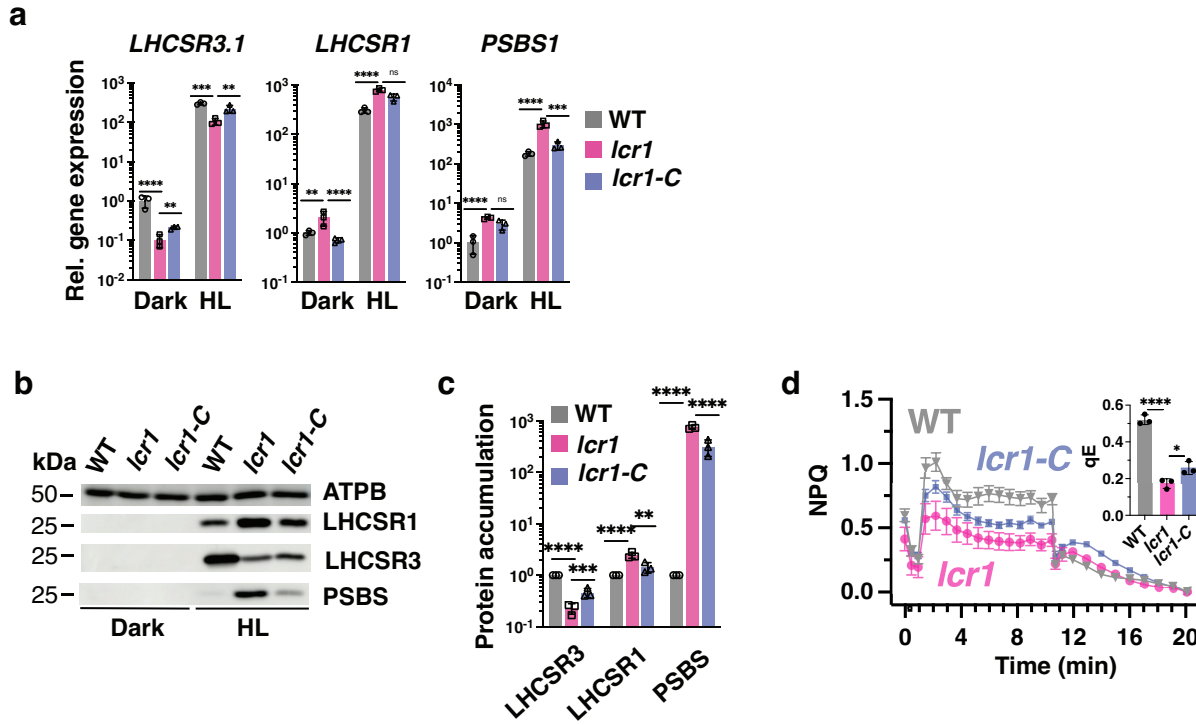

127

128

129

130

131

132

133

134

135

136

137

138

139

140

141

142

**Supplementary Fig. 7: LCR1 is required for proper expression of qE-related genes during transitions from dark-to-light.** WT, *lcr1* and *lcr1-C* cells were acclimated for 16h in darkness. After sampling for the dark conditions, light intensity was increased to  $300 \mu\text{mol photons m}^{-2} \text{s}^{-1}$  (HL); samples were taken 1 h (RNA) or 4 h (protein and photosynthetic measurements) after exposure to HL. **a.** Relative expression levels of qE genes at the indicated conditions normalized to WT LL ( $n = 3$  biological samples, mean  $\pm$  sd). **b.** Immunoblot analyses of LHCSR1, LHCSR3, PSBS and ATPB (loading control) of one out of the three biological replicate samples, under the indicated conditions. **c.** Summary graph of immunoblots of all replicate samples of Supplementary Fig. 4b after normalization to ATPB. Shown are the HL treated samples; WT protein levels were set as 1 ( $n = 3$  biological samples, mean  $\pm$  sd). **d.** NPQ and calculated qE, 4h after exposure to HL ( $n = 3$  biological samples, mean  $\pm$  s.d). **a, c, d.** The two-sided p-values for the comparisons are based on ANOVA Dunnett's multiple comparisons test and are indicated in the graphs (\*,  $P < 0.005$ , \*\*,  $P < 0.01$ , \*\*\*,  $P < 0.001$ , \*\*\*\*,  $P < 0.0001$ ). The exact p-values can be found in the Source Data file. Statistical analyses for panel **a** and **c** were applied on log<sub>10</sub>- transformed values.

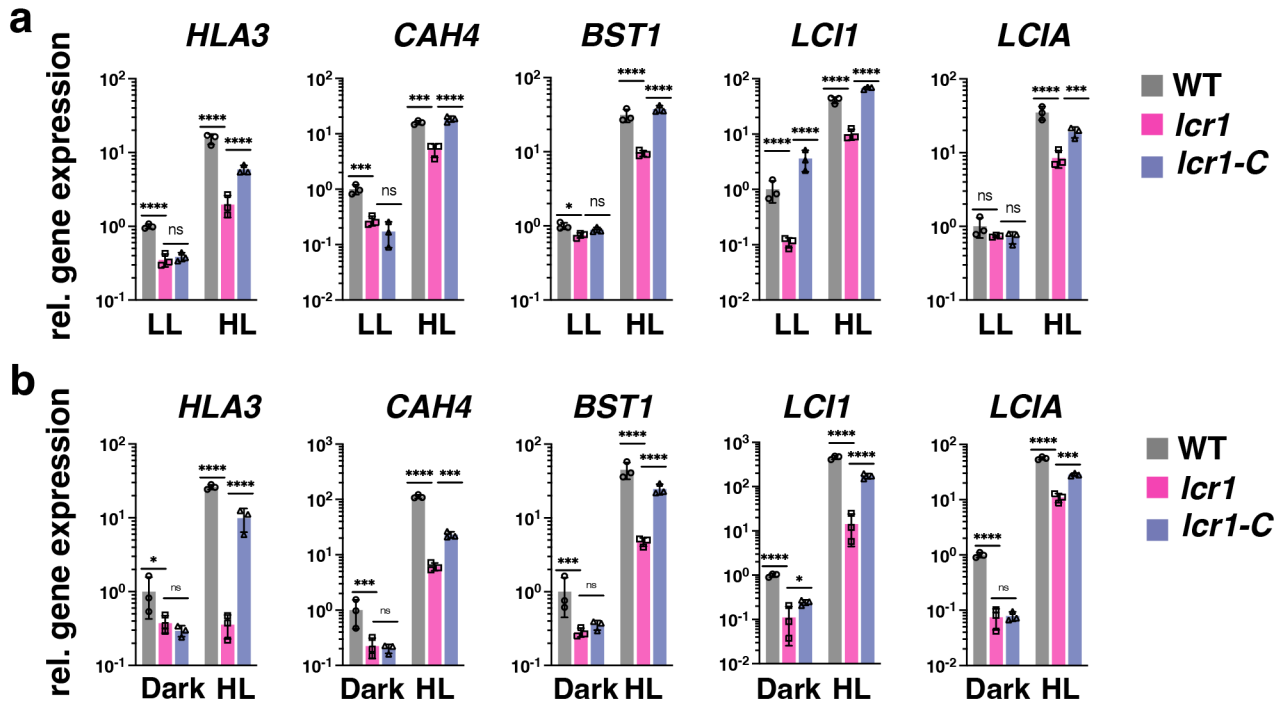

144

145

146

147

148

149

150

151

152

153

**Supplementary Fig. 8: LCR1 activates the transcription of CCM genes in LL and dark-acclimated cells. a.** WT, *lcr1* and *lcr1-C* cells were acclimated for 16h in LL ( $15 \mu\text{mol photons m}^{-2} \text{s}^{-1}$ ). After sampling under LL conditions, light intensity was increased to  $300 \mu\text{mol photons m}^{-2} \text{s}^{-1}$  (HL) and samples were taken 1 h after exposure to HL. Relative expression of CCM genes at the indicated conditions normalized to WT under LL ( $n = 3$  biological samples, mean  $\pm$  sd). **b.** Relative expression of CCM genes acclimated in 16h of darkness ( $n = 3$  biological samples, mean  $\pm$  sd). **a and b.** The two-sided p-values for the comparisons are based on ANOVA Dunnett's multiple comparisons test on log<sub>10</sub>-transformed values and are indicated in the graphs (\*,  $P < 0.005$ , \*\*,  $P < 0.01$ , \*\*\*,  $P < 0.001$ , \*\*\*\*,  $P < 0.0001$ ). The exact p-values can be found in the Source Data file.

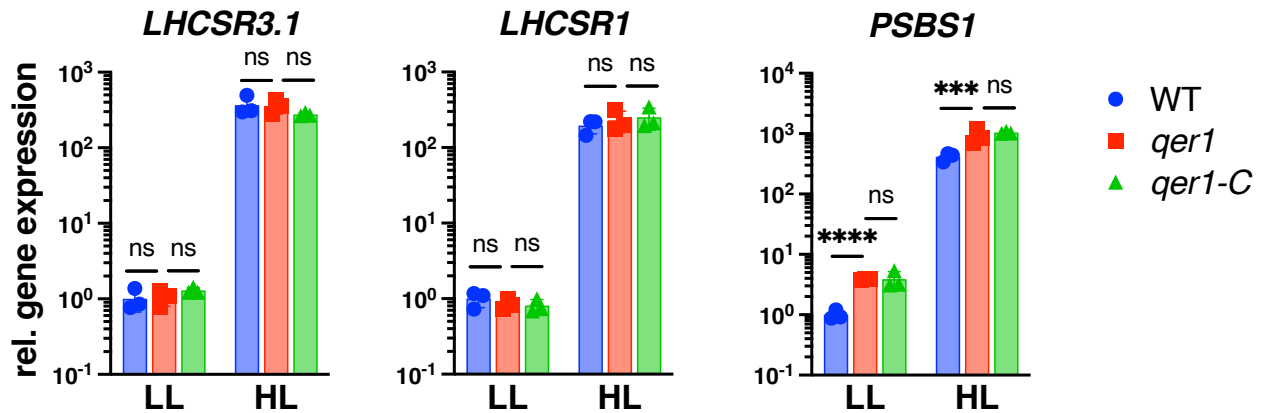

155  
156  
157

158 **Supplementary Fig.9: Complementation of *qer1* with *QER1* (*qer1-C* strain) fails to rescue the *LHCSR1* and**  
 159 ***PSBS1* phenotypes.** WT, *qer1* and *qer1-C* cells were acclimated for 16h in LL (15  $\mu\text{mol photons m}^{-2} \text{s}^{-1}$ ). After  
 160 sampling for the dark conditions, light intensity was increased to 300  $\mu\text{mol photons m}^{-2} \text{s}^{-1}$  (HL); RNA samples  
 161 were taken 1 h after exposure to HL. Shown are relative expression levels of qE genes at the indicated  
 162 conditions normalized to WT LL ( $n = 3$  biological samples, mean  $\pm$  sd). The two-sided p-values for the  
 163 comparisons are based on ANOVA Dunnett's multiple comparisons test on log<sub>10</sub>-transformed values and are  
 164 indicated in the graphs (\*\*\*,  $P = 0.0008$ , \*\*\*\*,  $P < 0.0001$ ).

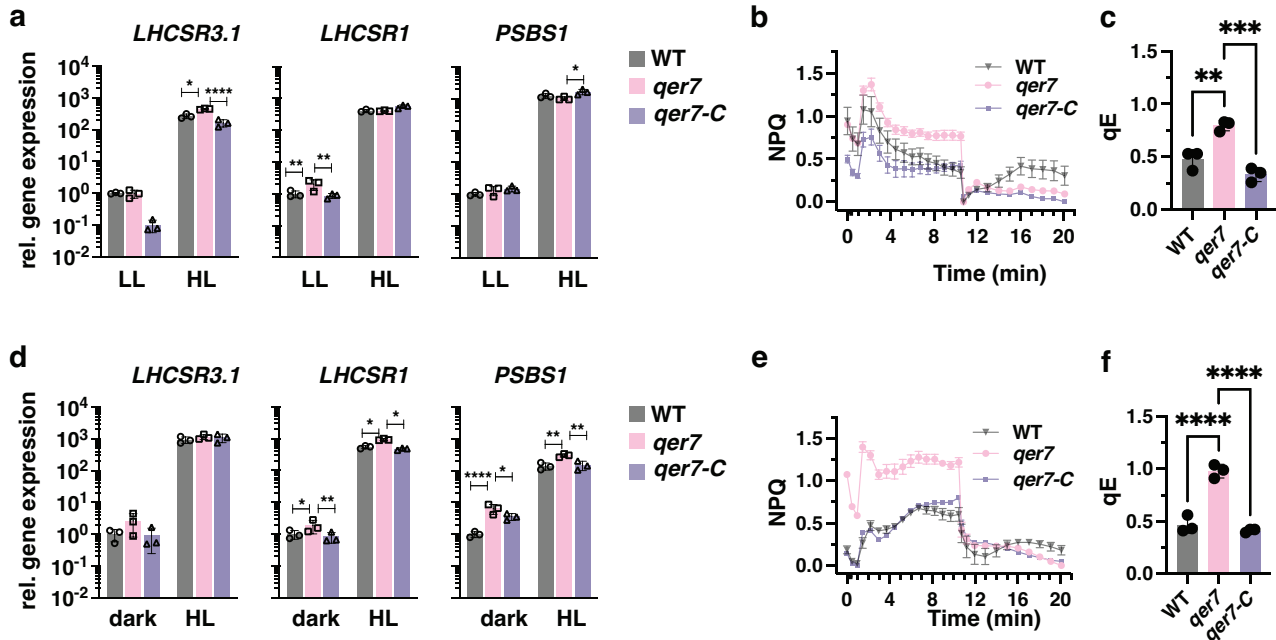

165

166 **Supplementary Fig.10: Relative expression of qE-related genes in asynchronous *qer7* cells.** WT, *qer7* and  
 167 *qer7-C* cells were acclimated for 16h in LL (15  $\mu\text{mol photons m}^{-2} \text{s}^{-1}$ ; **a-c**) or darkness (**d-f**). After sampling for  
 168 the LL or dark conditions, light intensity was increased to 300  $\mu\text{mol photons m}^{-2} \text{s}^{-1}$  (HL) and samples were  
 169 taken 1 h (RNA) or 4 h (photosynthetic measurements) after exposure to HL. **a, d**. Relative expression of qE  
 170 and CCM genes at the indicated conditions normalized to WT LL (**a**) or dark (**d**) respectively ( $n = 3$  biological  
 171 samples, mean  $\pm$  sd). **b, e**. NPQ and **c, f**. calculated qE, 4h after exposure to HL ( $n = 3$  biological samples, mean  
 172  $\pm$  s.d. **a, c, d, f**. The two-sided p-values for the comparisons are based on ANOVA Dunnett's multiple  
 173 comparisons test and are indicated in the graphs (\*,  $P < 0.005$ , \*\*,  $P < 0.01$ , \*\*\*,  $P < 0.001$ , \*\*\*\*,  $P < 0.0001$ ).  
 174 Statistical analyses for panel **a** and **d** were applied on  $\log_{10}$ - transformed values. The exact p-values can be  
 175 found in the Source Data file.

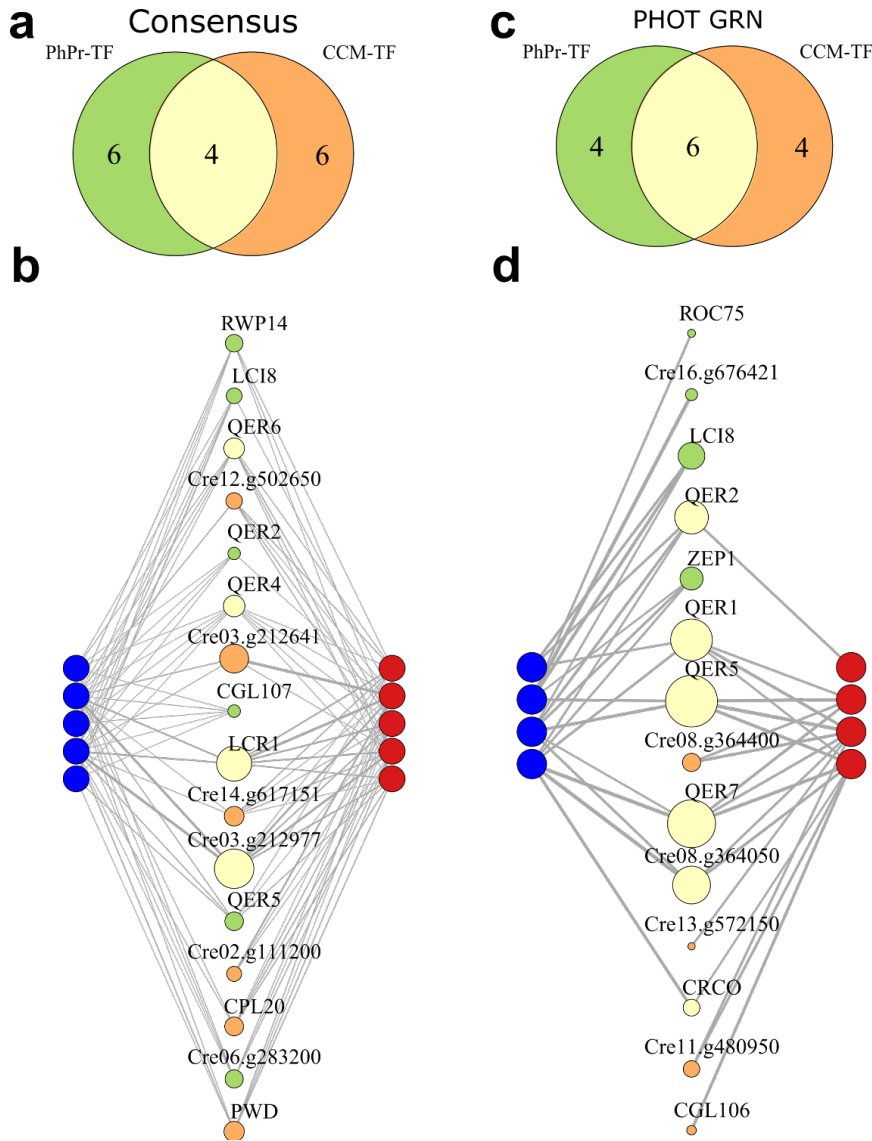

176  
177

178 **Supplementary Fig. 11: Reconstructed GRNs capture experimentally found regulators of qE and CCM.** Top:  
 179 Venn diagram depicting the overlap of the top 10 predicted regulators of carbon concentration mechanism  
 180 (CCM) genes included in **Fig. 4a**, and photoprotective (PhPr) genes based on **a.** the consensus or **c.** PHOT-  
 181 specific GRN. Bottom: Network representation of the top ten TF sets of **b.** the consensus network or **d.** the  
 182 phot GRN (center nodes, same color code as in panel **a**) and the target genes present in the respective  
 183 network. qE-related genes (*LHCSR1*, *LHCSR3.1*, *LHCSR3.2*, *PSBS1*, *PSBS2*) are plotted in blue, and CCM genes  
 184 included in **Fig. 4a** (*HLA3*, *CAH4*, *LCR1*, *BST1*, *LCI1*, *LCIA*) in red. In **b** the plotted regulatory strength  
 185 corresponds to  $\log\left(\frac{1}{r_{consen}}\right)$ , in **d.**, it corresponds to the GENIE3 edge weights denoting random forest  
 186 importance measure. The edge width is proportional to the strength of the specific regulatory interaction.  
 187 Size of the TF nodes corresponds to the sum of all plotted target gene edge weights. See also **Supplementary**  
 188 **Table 4,6** for QER locus IDs.

189

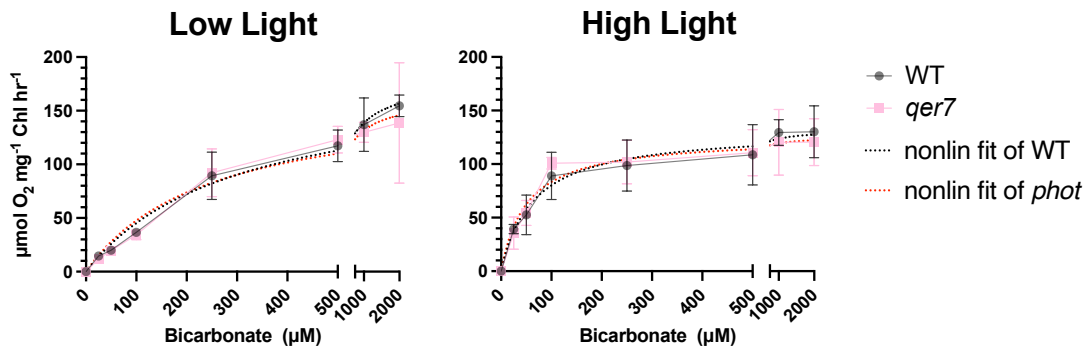

190

191 **Supplementary Fig. 12: Ci affinity measurements in *qer7*.** Oxygen evolution as a function of external Ci for  
 192 WT and *qer7* cells grown under continuous LL ( $15 \mu\text{mol m}^{-2} \text{s}^{-1}$ ) or exposed to HL ( $300 \mu\text{mol m}^{-2} \text{s}^{-1}$ ) for 4h, in  
 193 photoautotrophic conditions (Sueoka's high salt medium; HSM), at 23 °C in Erlenmeyer flasks shaken at 125  
 194 rpm ( $n = 3$  biological samples, mean  $\pm$  sd). Non-linear curve fitting to the Michaelis-Menten equation is shown  
 195 in dotted lines.  $k_{1/2}(\text{Ci})$  and  $V_{\text{max}}$  values are presented in **Supplementary Table 7**.

196

197

198

199

200

201

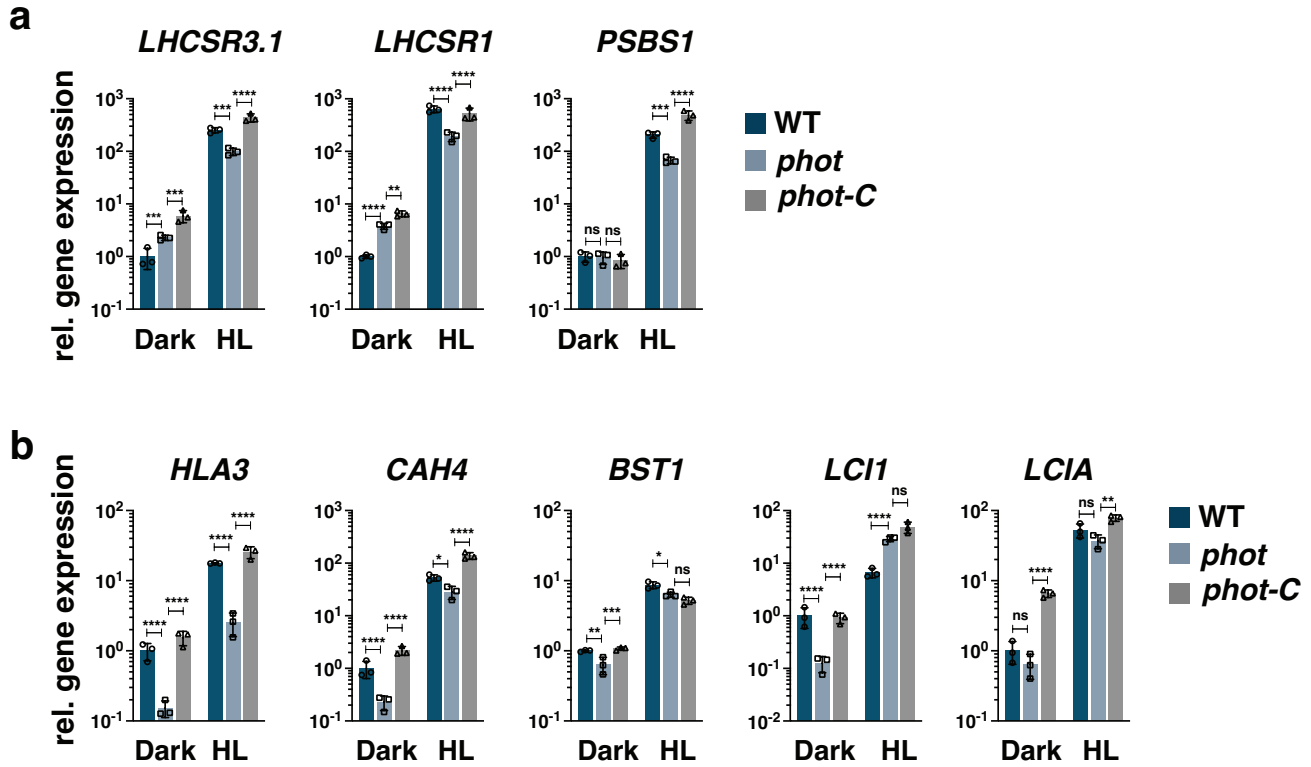

202

203

204

205

206

207

208

209

210

211

212

**Supplementary Fig. 13: Phototropin dependent regulation of CCM gene expression.** WT, *phot* and *phot-C* cells were synchronized under 12h light ( $15 \mu\text{mol m}^{-2} \text{s}^{-1}$ )/12h dark cycles, in photoautotrophic conditions (Sueoka's high salt medium; HSM), at 23 °C in Erlenmeyer flasks shaken at 125 rpm. After sampling at the end of the dark phase, cells were exposed to  $300 \mu\text{mol photons m}^{-2} \text{s}^{-1}$  (HL) and samples were taken 1 h after HL exposure. Relative expression levels of CCM (a) and qE (b) genes at the indicated conditions normalized to WT dark ( $n = 3$  biological samples, mean  $\pm$  sd). The two-sided p-values for the comparisons are based on ANOVA employing Dunnett's multiple comparisons test on log<sub>10</sub>-transformed values and are indicated in the graphs (\*,  $P < 0.005$ , \*\*,  $P < 0.01$ , \*\*\*,  $P < 0.001$ , \*\*\*\*,  $P < 0.0001$ ). The exact p-values can be found in the Source Data file.

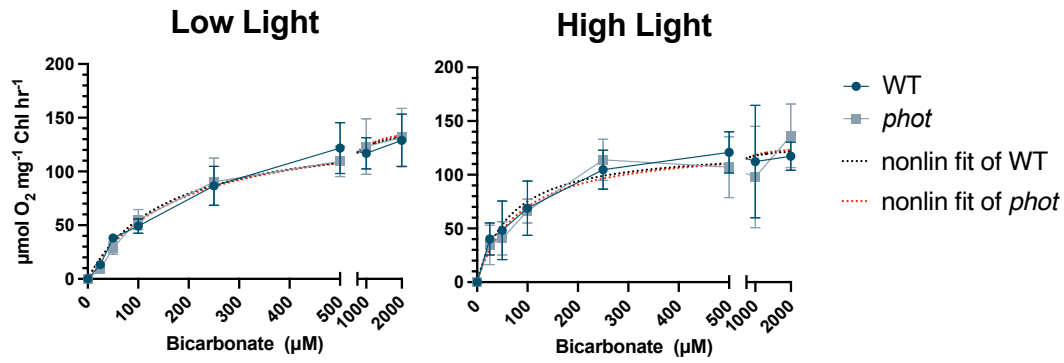

213

214 **Supplementary Fig. 14:** Oxygen evolution as a function of external Ci for WT and *phot* cells grown under  
 215 continuous LL (15 µmol m<sup>-2</sup> s<sup>-1</sup>) or exposed to HL (300 µmol m<sup>-2</sup> s<sup>-1</sup>) for 4h, in photoautotrophic conditions  
 216 (Sueoka's high salt medium; HSM), at 23 °C in Erlenmeyer flasks shaken at 125 rpm (*n* = 3 biological samples,  
 217 mean ± sd). Non-linear curve fitting to the Michaelis-Menten equation is shown in dotted lines. *k*<sub>1/2</sub>(Ci) and  
 218 *V*<sub>max</sub> values are presented in **Supplementary Table 7**.

219

220

221

222

223



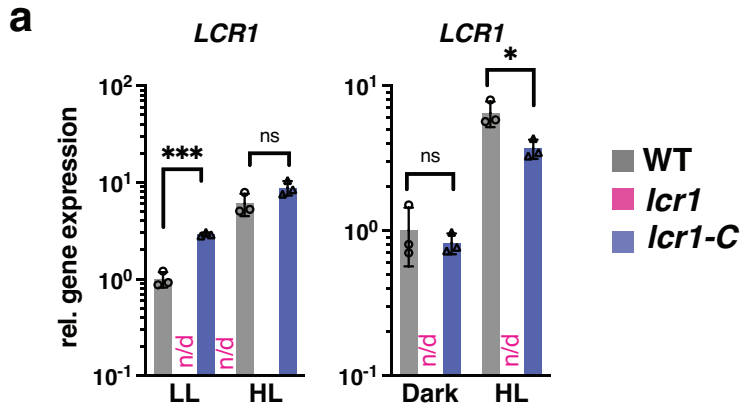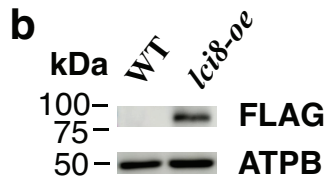

224

225 **Supplementary Fig. 15: LCR1 mutation and LCI8 overexpression confirmation.** **a.** Relative expression of *LCR1*  
 226 in WT, *lcr1* and *lcr1-C* strains. Cells were acclimated for 16h in LL or darkness. After sampling for the LL or dark  
 227 conditions, light intensity was increased to 300  $\mu\text{mol photons m}^{-2} \text{s}^{-1}$  (HL), and samples for RNA purification  
 228 were taken 1 h after exposure to HL ( $n = 3$  biological samples, mean  $\pm$  sd). *LCR1* gene expression was non-  
 229 detectable (indicated as n/d in the graphs) in the *lcr1* mutant. The two-sided p-values for the comparisons  
 230 are based on unpaired t-tests on log<sub>10</sub>-transformed values and are indicated in the graphs (\*,  $P < 0.005$ , \*\*\*,  
 231  $P < 0.001$ ). The exact p-values can be found in the Source Data file. **b.** Immunoblot analysis of LCI8-FLAG fused  
 232 protein in WT and *lci8-oe* cells grown in TAP, LL. Representative immunoblot of an experiment repeated twice.

233

234

235

236

237 **Supplementary Table Captions**

238 **Supplementary Table 1:** RNAseq data sets used in this study.

239 **Supplementary Table 2:** List of Transcription factors used in this study; Family info was adapted from refs  
240 41 and 42.

241

242 **Supplementary Table 3:** Edge list representation of the consensus network with mean ranks resulting from  
243 Borda count election method (refs 48 and 52) as edge attributes.

244

245 **Supplementary Table 4:** Top 10 predicted regulators of qE genes in the consensus GRN.

246

247 **Supplementary Table 5:** Edge list representation of the PHOT-specific GRN with importance score from  
248 GENIE 3 (ref. 68) as edge attributes.

249

250 **Supplementary Table 6:** Top 10 predicted regulators of qE genes in the PHOT-specific GRN.

251

252 **Supplementary Table 7:** Supplementary Table 7:  $k_{1/2}(Ci)$  and  $V_{max}$  values calculated from External Data Fig.  
253 12 and 14.

254

255 **Supplementary Table 8:** List of genes putatively involved in photoprotection used for regulator prediction.

256

257 **Supplementary Table 9:** List of genes putatively involved in CCM used for regulator prediction.

258

259 **Supplementary Table 10:** Global coregulators of photoprotection and CCM based on the consensus  
260 network.

261

262 **Supplementary Table 11:** Global coregulators of photoprotection and CCM based on the PHOT specific  
263 network.

264

265 **Supplementary Table 12:** PCR primers for CLiP mutant validation and complementation in this study.

266

267 **Supplementary Table 13:** RT-qPCR primers for all genes in this study.

268

269

270

271 **Supplementary list of references**

272

273 1. Li, X. *et al.* A genome-wide algal mutant library and functional screen identifies genes required for eukaryotic  
274 photosynthesis. *Nat. Genet.* **51**, 627–635 (2019).

275

276 2. Marbach, D. *et al.* Wisdom of crowds for robust gene network inference. *Nat. Methods* **9**, 796–804 (2012).

277
