# Supplementary material for: Widening the landscape of transcriptional regulation of green algal photoprotection
Source: PubMed Central journal article supplement (PMC10172295; doi:10.1038/s41467-023-38183-4), 2023-05-10
Supplement: 41467_2023_38183_MOESM3_ESM.pdf [file 41467_2023_38183_MOESM3_ESM.pdf]

## **Description of Additional Supplementary Files**

**Supplementary Data 1:** RNAseq data sets used in this study.

**Supplementary Data 2:** List of Transcription factors used in this study; Family info was adapted from refs 41 and 42.

**Supplementary Data 3:** Edge list representation of the consensus network with mean ranks resulting from Borda count election method (refs 48 and 52) as edge attributes.

**Supplementary Data 4:** Top 10 predicted regulators of qE genes in the consensus GRN.

**Supplementary Data 5:** Edge list representation of the PHOT-specific GRN with importance score from GENIE 3 (ref. 68) as edge attributes.

**Supplementary Data 6:** Top 10 predicted regulators of qE genes in the PHOT-specific GRN.

**Supplementary Data 7:** Supplementary Data 7:  $k_{1/2}(Ci)$  and  $V_{max}$  values calculated from External Data Fig.12 and 14.

**Supplementary Data 8:** List of genes putatively involved in photoprotection used for regulator prediction.

**Supplementary Data 9:** List of genes putatively involved in CCM used for regulator prediction.

**Supplementary Data 10:** Global coregulators of photoprotection and CCM based on the consensus network.

**Supplementary Data 11:** Global coregulators of photoprotection and CCM based on the PHOT specific network.

**Supplementary Data 12:** PCR primers for CLiP mutant validation and complementation in this study.

**Supplementary Data 13:** RT-qPCR primers for all genes in this study.
